# Supplementary material
Source: Research Square preprint supplement (doi:10.21203/rs.3.rs-9246191/v1)
Supplement: Supplementary file 1 [file 078dc829b85f7ddb97f36394.docx]

**Table 1:** Patient characteristics

# n = 255 (%)

| Age (median) | 63 (16 to 81 years) |
| --- | --- |
| Male | 202 (79.2) |
| Female | 53 (20.8) |
| Pain time until surgery >24 hours | 196 (76.9) |
| Severe underlying disease | 127 (49.8) |
| Shock before surgery | 78 (30.6) |
| CT Scan | 250 (98) |

**Table 2**: Surgical characteristics and results

# n = 255 (%)

| Endoscopic surgery | 69 (27) |
| --- | --- |
| Open surgery | 186 (73) |
| Suture closure | 248 (97.2) |
| Gastrectomy | 7 (2.8) |
| Perforation size (cm) | 1.18 ± 0.93 |
| Stomach perforation | 123 (48.2) |

| Duodenal perforation | 132 (51.8) |
| --- | --- |
| Median hospital stays (days) | 7 (1 to 41 days) |
| Total complications | 103 (40.2) |
| Pneumonia | 101 (39.6) |
| Septic shock | 80 (31.4) |
| Surgical wound infection | 76 (29.8) |
| Residual abscess | 13 (5.1) |
| Suture leak | 8 (3,1) |
| Abdominal wall burst | 1 (0.4) |
| Reoperation | 4 (1.6) |

**Table 3**: Sensitivity, specificity, positive predictive value, negative predictive value, accuracy and AUC value of Boey score in predicting mortality and complications.

| **Outcome** | **Cut Off Boey** | **Sensitivity (%)** | **Specificity (%)** | **Positive predictive (%)** | **Negative predictive (%)** | **95% CI** | **AUC** | **P**  **value** |
| --- | --- | --- | --- | --- | --- | --- | --- | --- |
| **Mortality** | ≥ 2 | 96.9 | 65.3 | 48.8 | 98.4 | (0.825–0.931) | 0.878 | 0.022 |
| **Complications** | ≥ 2 | 79.7 | 83.8 | 85.3 | 77.8 | (0.814–0.910) | 0.862 | 0.023 |

**Table 4**: Mortality and complication rates of the authors

|  | **Mortality rate (%)** | **Complication rate (%)** | **Age (Median)** | **Sample size (n)** |
| --- | --- | --- | --- | --- |
| We | 25.5 | 54.1 | 61 (Median) | 255 |
| Abhishek [8] | 13.9 | 43.9 | 48 | 186 |

| Lohsiriwat [9] | 9 | 30 | 52 | 152 |
| --- | --- | --- | --- | --- |
| Sah [12] | 18 | 64 | 45 | 50 |
| Taha [13] | 19 | (-) | 64 (Median) | 270 |
| Forsmo [14] | 22 | 38.2 | 71 (Median) | 102 |
| Egberts [15] | 24 | 44 | 67 (Median) | 261 |
| Moller [16] | 27 | (-) | 71 (Median) | 2668 |

**Table 5**: AUC values of the authors

|  | **Area under the ROC**  **curve (AUC)** | |
| --- | --- | --- |
| **Mortality** | **Total complications** |
| We | 0.878 | 0.862 |
| Mishra [6] | 0.85 | (-) |
| Aleksandr [7] | 0.941 | 0.904 |
| Lohsiriwat [9] | 0.86 | (-) |
| Ebru [18] | 0.92 | (-) |
